# Supplementary material
Source: publisher figshare collection journal article supplement (https://karger.figshare.com/ndownloader/files/25734923)
Supplement: Supplementary file 1 [file 25734923]

**Supplementary Table 2.** Older adults’ strategies for coping with interpersonal tension

|  |  | Close Partners | | |  | Non-close Partners | | |  | Anyone | | |
| --- | --- | --- | --- | --- | --- | --- | --- | --- | --- | --- | --- | --- |
| (*I*)  Coping strategies | (*J*)  Coping strategies | Mean Differences  (*I*-*J*) | | *SE* |  | Mean Differences  (*I*-*J*) | | *SE* |  | Mean Differences  (*I*-*J*) | | *SE* |
| Avoidance | Constructive | -0.74 | *** | 0.13 |  | 0.28 |  | 0.16 |  | -0.20 | * | 0.07 |
|  | Destructive | 0.75 | *** | 0.12 |  | 1.60 | *** | 0.13 |  | 1.23 | *** | 0.06 |
| Constructive | Destructive | 1.49 | *** | 0.12 |  | 1.32 | *** | 0.11 |  | 1.43 | *** | 0.06 |

*Note*. This table presents Bonferroni post hoc pairwise comparisons in older adults’ preferences for each coping strategy.

**p* < .01, ****p* < .001.
